# Supplementary material for: Observed and CMIP6 model simulated organic aerosol response to drought in the contiguous United States during summertime
Source: Copernicus journal article supplement (doi:10.5194/egusphere-2024-430), 2024-03-12
Supplement: Supplementary file 1 [file egusphere-2024-430-supplement.pdf]

*Supplement of*

**Observed and CMIP6 model simulated organic aerosol response to drought in the contiguous United States during summertime**

Wei Li<sup>1,2</sup> and Yuxuan Wang<sup>1</sup>

<sup>1</sup>Department of Earth and Atmospheric Sciences, University of Houston, Houston, Texas, USA.

<sup>2</sup>Now at Cooperative Institute for Satellite Earth System Studies, George Mason University, Fairfax, Virginia, USA

*Corresponding author:* Yuxuan Wang (ywang246@central.uh.edu)

**Table S1. Information of the ten CMIP6 models selected for evaluation.**

| <b>Models</b>         | <b>Resolution<br/>(lat×lon)</b> | <b>Aerosol scheme</b> | <b>Model references</b>   |
|-----------------------|---------------------------------|-----------------------|---------------------------|
| BCC-ESM1              | 2.81°×2.81°                     | BCC-AGCM3-Chem        | Wu et al. (2020)          |
| CESM2-WACCM           | 0.95°×1.25°                     | MAM4                  | Danabasoglu et al. (2020) |
| CNRM-ESM2-1           | 1.40°×1.40°                     | TACTIC                | Séférian et al. (2019)    |
| EC-Earth3-<br>AerChem | 2.00°×3.00°                     | TM5                   | van Noije et al. (2021)   |
| GFDL-ESM4             | 1.00°×1.25°                     | Bulk aerosol scheme   | Dunne et al. (2020)       |
| GISS-E2-1-G           | 2.00°×2.50°                     | TCADI                 | Kelley et al. (2020)      |
| MIROC6                | 1.40°×1.40°                     | SPRINTARS             | Tatebe et al. (2019)      |
| MRI-ESM2-0            | 1.87°×1.87°                     | MASINGAR              | Yukimoto et al. (2019)    |
| NorESM2-LM            | 1.87°×2.50°                     | OsloAero6             | Seland et al. (2020)      |
| UKESM1-0-LL           | 1.25°×1.87°                     | UKCA1                 | Senior et al. (2020)      |

## References

Danabasoglu, G., Lamarque, J.-F., Bacmeister, J., Bailey, D. A., DuVivier, A. K., Edwards, J., Emmons, L. K., Fasullo, J., Garcia, R., Gettelman, A., Hannay, C., Holland, M. M., Large, W. G., Lauritzen, P. H., Lawrence, D. M., Lenaerts, J. T. M., Lindsay, K., Lipscomb, W. H., Mills, M. J., Neale, R., Oleson, K. W., Otto-Bliesner, B., Phillips, A. S., Sacks, W., Tilmes, S., van Kampenhout, L., Verstenstein, M., Bertini, A., Dennis, J., Deser, C., Fischer, C., Fox-Kemper, B., Kay, J. E., Kinnison, D., Kushner, P. J., Larson, V. E., Long, M. C., Mickelson, S., Moore, J. K., Nienhouse, E., Polvani, L., Rasch, P. J., and Strand, W. G.: The Community Earth System Model Version 2 (CESM2), *J. Adv. Model. Earth Syst.*, 12, e2019MS001916, <https://doi.org/10.1029/2019MS001916>, 2020.

Dunne, J. P., Horowitz, L. W., Adcroft, A. J., Ginoux, P., Held, I. M., John, J. G., Krasting, J. P., Malyshev, S., Naik, V., Paulot, F., Shevliakova, E., Stock, C. A., Zadeh, N., Balaji, V., Blanton, C., Dunne, K. A., Dupuis, C., Durachta, J., Dussin, R., Gauthier, P. P. G., Griffies, S. M., Guo, H., Hallberg, R. W., Harrison, M., He, J., Hurlin, W., McHugh, C., Menzel, R., Milly, P. C. D., Nikonov, S., Paynter, D. J., Ploshay, J., Radhakrishnan, A., Rand, K., Reichl, B. G., Robinson, T., Schwarzkopf, D. M., Sentman, L. T., Underwood, S., Vahlenkamp, H., Winton, M., Wittenberg, A. T., Wyman, B., Zeng, Y., and Zhao, M.: The GFDL Earth System Model Version 4.1 (GFDL-ESM 4.1): Overall Coupled Model Description and Simulation Characteristics, *J. Adv. Model. Earth Syst.*, 12, e2019MS002015, <https://doi.org/10.1029/2019MS002015>, 2020.

Kelley, M., Schmidt, G. A., Nazarenko, L. S., Bauer, S. E., Ruedy, R., Russell, G. L., Ackerman, A. S., Aleinov, I., Bauer, M., Bleck, R., Canuto, V., Cesana, G., Cheng, Y., Clune, T. L., Cook, B. I., Cruz, C. A., Del Genio, A. D., Elsaesser, G. S., Faluvegi, G., Kiang, N. Y., Kim, D., Lacis, A. A., Leboissetier, A., LeGrande, A. N., Lo, K. K., Marshall, J., Matthews, E. E., McDermid, S., Mezuman, K., Miller, R. L., Murray, L. T., Oinas, V., Orbe, C., García-Pando, C. P., Perlwitz, J. P., Puma, M. J., Rind, D., Romanou, A., Shindell, D. T., Sun, S., Tausnev, N., Tsigaridis, K., Tselioudis, G., Weng, E., Wu, J., and Yao, M.-S.:

GISS-E2.1: Configurations and Climatology, *J. Adv. Model. Earth Syst.*, 12, e2019MS002025, <https://doi.org/10.1029/2019MS002025>, 2020.

van Noije, T., Bergman, T., Le Sager, P., O'Donnell, D., Makkonen, R., Gonçalves-Ageitos, M., Döscher, R., Fladrich, U., von Hardenberg, J., Keskinen, J.-P., Korhonen, H., Laakso, A., Myriokefalitakis, S., Ollinaho, P., Pérez García-Pando, C., Reerink, T., Schrödner, R., Wyser, K., and Yang, S.: EC-Earth3-AerChem: a global climate model with interactive aerosols and atmospheric chemistry participating in CMIP6, *Geosci. Model Dev.*, 14, 5637–5668, <https://doi.org/10.5194/gmd-14-5637-2021>, 2021.

Séférian, R., Nabat, P., Michou, M., Saint-Martin, D., Voldoire, A., Colin, J., Decharme, B., Delire, C., Berthet, S., Chevallier, M., Sénési, S., Franchisteguy, L., Vial, J., Mallet, M., Joetzjer, E., Geoffroy, O., Guérémy, J.-F., Moine, M.-P., Msadek, R., Ribes, A., Rocher, M., Roehrig, R., Salas-y-Mélia, D., Sanchez, E., Terray, L., Valcke, S., Waldman, R., Aumont, O., Bopp, L., Deshayes, J., Éthé, C., and Madec, G.: Evaluation of CNRM Earth System Model, CNRM-ESM2-1: Role of Earth System Processes in Present-Day and Future Climate, *J. Adv. Model. Earth Syst.*, 11, 4182–4227, <https://doi.org/10.1029/2019MS001791>, 2019.

Seland, Ø., Bentsen, M., Olivié, D., Toniazzo, T., Gjermundsen, A., Graff, L. S., Debernard, J. B., Gupta, A. K., He, Y.-C., Kirkevåg, A., Schwinger, J., Tjiputra, J., Aas, K. S., Bethke, I., Fan, Y., Griesfeller, J., Grini, A., Guo, C., Ilicak, M., Karset, I. H. H., Landgren, O., Liakka, J., Moseid, K. O., Nummelin, A., Spensberger, C., Tang, H., Zhang, Z., Heinze, C., Iversen, T., and Schulz, M.: Overview of the Norwegian Earth System Model (NorESM2) and key climate response of CMIP6 DECK, historical, and scenario simulations, *Geosci. Model Dev.*, 13, 6165–6200, <https://doi.org/10.5194/gmd-13-6165-2020>, 2020.

Senior, C. A., Jones, C. G., Wood, R. A., Sellar, A., Belcher, S., Klein-Tank, A., Sutton, R., Walton, J., Lawrence, B., Andrews, T., and Mulcahy, J. P.: U.K. Community Earth System Modeling for CMIP6, *J. Adv. Model. Earth Syst.*, 12, e2019MS002004, <https://doi.org/10.1029/2019MS002004>, 2020.

Tatebe, H., Ogura, T., Nitta, T., Komuro, Y., Ogochi, K., Takemura, T., Sudo, K., Sekiguchi, M., Abe, M., Saito, F., Chikira, M., Watanabe, S., Mori, M., Hirota, N., Kawatani, Y., Mochizuki, T., Yoshimura, K., Takata, K., O'ishi, R., Yamazaki, D., Suzuki, T., Kurogi, M., Kataoka, T., Watanabe, M., and Kimoto, M.: Description and basic evaluation of simulated mean state, internal variability, and climate sensitivity in MIROC6, *Geosci. Model Dev.*, 12, 2727–2765, <https://doi.org/10.5194/gmd-12-2727-2019>, 2019.

Wu, T., Zhang, F., Zhang, J., Jie, W., Zhang, Y., Wu, F., Li, L., Yan, J., Liu, X., Lu, X., Tan, H., Zhang, L., Wang, J., and Hu, A.: Beijing Climate Center Earth System Model version 1 (BCC-ESM1): model description and evaluation of aerosol simulations, *Geosci. Model Dev.*, 13, 977–1005, <https://doi.org/10.5194/gmd-13-977-2020>, 2020.

Yukimoto, S., Kawai, H., Koshiro, T., Oshima, N., Yoshida, K., Urakawa, S., Tsujino, H., Deushi, M., Tanaka, T., Hosaka, M., Yabu, S., Yoshimura, H., Shindo, E., Mizuta, R., Obata, A., Adachi, Y., and Ishii, M.: The Meteorological Research Institute Earth System Model Version 2.0, MRI-ESM2.0: Description and Basic Evaluation of the Physical Component, *J. Meteorol. Soc. Jpn. Ser II*, 97, 931–965, <https://doi.org/10.2151/jmsj.2019-051>, 2019.
